# Supplementary material for: The Winner Takes it All: Risk Factors and Bayesian Modelling of the Probability of Success in Escaping from Big Cat Predation
Source: Animals (Basel). 2021 Dec 28;12(1):51. doi: 10.3390/ani12010051 (PMC8749502; doi:10.3390/ani12010051)
Supplement: Supplementary file 1 [file animals-12-00051-s001.zip › animals-1429974-supplementary.pdf]

**Table S1.** Summary of the variables and their respective levels considered during the study of prey escape success in case of attack of big cats.

| Cluster                      | Variable                                                                           | Type      | Levels                                                                                                                                                                                                                                                                                                                                                                                                                               |
|------------------------------|------------------------------------------------------------------------------------|-----------|--------------------------------------------------------------------------------------------------------------------------------------------------------------------------------------------------------------------------------------------------------------------------------------------------------------------------------------------------------------------------------------------------------------------------------------|
| Predator                     | Animal species                                                                     | Nominal   | Lion, leopard, jaguar, tiger, cheetah, puma, snow leopard, panther, serval, ocelot and caracal                                                                                                                                                                                                                                                                                                                                       |
|                              | Sex                                                                                | Nominal   | Male/Female                                                                                                                                                                                                                                                                                                                                                                                                                          |
|                              | Age Range                                                                          | Ordinal   | Young/Adult                                                                                                                                                                                                                                                                                                                                                                                                                          |
|                              | Type of attack                                                                     | Nominal   | Single/Combined                                                                                                                                                                                                                                                                                                                                                                                                                      |
|                              | Hunting mode                                                                       | Nominal   | Individual/Partner/Group of more than two animals                                                                                                                                                                                                                                                                                                                                                                                    |
|                              | Number of predators                                                                | Ordinal   | 1-30                                                                                                                                                                                                                                                                                                                                                                                                                                 |
|                              | Time from first attention to action (seconds)                                      | Numerical | Between 2" and 130".                                                                                                                                                                                                                                                                                                                                                                                                                 |
|                              | Time from first attention to interaction or direct contact with the prey (seconds) | Numerical | Between 4" and 217".                                                                                                                                                                                                                                                                                                                                                                                                                 |
|                              | Predator's point of attachment to its prey                                         | Nominal   | Head, neck, back, limb, abdominal region, rear third and wing                                                                                                                                                                                                                                                                                                                                                                        |
|                              | State of the predator at the end of the hunt                                       | Nominal   | Healthy, injured and dead                                                                                                                                                                                                                                                                                                                                                                                                            |
|                              | Hunting Attempts                                                                   | Ordinal   | 1 a 7                                                                                                                                                                                                                                                                                                                                                                                                                                |
| Prey                         | Animal species                                                                     | Nominal   | Baboon, Bear, African Stork, Boar, Buffalo, Capibara, Caracal, Catfish, Crocodile, Red deer, Donkey, Duiker, African Elephant, Fennec, Giant Otter, Giraffe, Guanaco, Guinea fowl, Hare, Himalayan Ibex, Hippopotamus, Impala, Jackal, Kudu, Markhor, Rhesus macaque, Pyrenean ibex, Mule deer, Oryx, Ostrich, Owl, Reedbuck, Rhinoceros, Roan antelope, Sloth, Springbok, Steenbok, Topi, Warthog, Wildebeest, Yak, Zebra and Zebu. |
|                              | Number of dams                                                                     | Ordinal   | 1-2                                                                                                                                                                                                                                                                                                                                                                                                                                  |
|                              | Sex                                                                                | Nominal   | Male/Female                                                                                                                                                                                                                                                                                                                                                                                                                          |
|                              | Age Range                                                                          | Ordinal   | Young/Adult                                                                                                                                                                                                                                                                                                                                                                                                                          |
|                              | Social group                                                                       | Nominal   | Alone, in pairs or in a herd                                                                                                                                                                                                                                                                                                                                                                                                         |
| Natural physical environment | Time of day                                                                        | Nominal   | Day/Night                                                                                                                                                                                                                                                                                                                                                                                                                            |
|                              | Atmospheric conditions                                                             | Nominal   | Sun, clouds, rain, snow and clear night                                                                                                                                                                                                                                                                                                                                                                                              |
|                              | Orography                                                                          | Nominal   | Snowy terrain, forest, savannah, jungle, country road, road, rocky terrain, mountain, pond, lake and river                                                                                                                                                                                                                                                                                                                           |
| General                      | Cause of escape                                                                    | Nominal   | Habitat characteristics, group protection, mother's protection of her offspring, relative size of prey, predator's fear of the presence of other potentially threatening element(s), practical experience of the predator, prey defense strategies, relative physical strength of the prey, predator's death during the attack, and prior sighting of the predator by the fleeing prey.                                              |
